# Supplementary material
Source: PubMed Central journal article supplement (PMC4574260)
Supplement: 10.1534_115.178038_genetics.115.178038-1.pdf [file 10.1534_115.178038_genetics.115.178038-1.pdf]

**Table S1 Difference in genetic gain between OHV GS when varying the number of offspring produced per cross (nOff)**

| Gen | Off10  | SE Off10 | Off20  | SE Off20 | Off50 | SE Off50 | Off80 | SE Off80 | Off100 | SE Off100 | Off200 | SE Off200 | Off500 | SE Off500 | Off1000 | SE Off1000 |
|-----|--------|----------|--------|----------|-------|----------|-------|----------|--------|-----------|--------|-----------|--------|-----------|---------|------------|
| 2   | -0.005 | 0.136    | -0.022 | 0.128    | 0.092 | 0.134    | 0.048 | 0.132    | 0.059  | 0.131     | 0.051  | 0.154     | 0.059  | 0.134     | 0.036   | 0.134      |
| 3   | -0.029 | 0.119    | 0.029  | 0.146    | 0.048 | 0.166    | 0.048 | 0.169    | -0.001 | 0.131     | 0.066  | 0.127     | -0.027 | 0.135     | 0.101   | 0.150      |
| 4   | -0.041 | 0.140    | -0.019 | 0.136    | 0.035 | 0.136    | 0.049 | 0.130    | 0.024  | 0.136     | 0.108  | 0.129     | 0.086  | 0.151     | 0.129   | 0.148      |
| 5   | 0.008  | 0.127    | -0.021 | 0.121    | 0.026 | 0.149    | 0.106 | 0.127    | 0.039  | 0.138     | 0.185  | 0.128     | 0.105  | 0.131     | 0.138   | 0.152      |
| 6   | 0.025  | 0.122    | 0.127  | 0.115    | 0.099 | 0.117    | 0.078 | 0.142    | 0.125  | 0.127     | 0.211  | 0.140     | 0.258  | 0.162     | 0.320   | 0.168      |
| 7   | 0.044  | 0.148    | 0.095  | 0.120    | 0.154 | 0.129    | 0.183 | 0.117    | 0.222  | 0.125     | 0.281  | 0.167     | 0.242  | 0.142     | 0.331   | 0.170      |
| 8   | 0.067  | 0.125    | 0.112  | 0.114    | 0.208 | 0.119    | 0.239 | 0.119    | 0.228  | 0.124     | 0.350  | 0.148     | 0.329  | 0.159     | 0.396   | 0.185      |
| 9   | 0.086  | 0.143    | 0.164  | 0.131    | 0.198 | 0.117    | 0.297 | 0.126    | 0.328  | 0.117     | 0.329  | 0.143     | 0.364  | 0.165     | 0.503   | 0.194      |
| 10  | 0.051  | 0.123    | 0.188  | 0.116    | 0.274 | 0.105    | 0.363 | 0.130    | 0.374  | 0.126     | 0.382  | 0.118     | 0.451  | 0.173     | 0.592   | 0.218      |

**Table S2 Difference in genetic gain between OHV and GS when varying the number of doubled haploids produced per elite individual (nDH)**

| Gen | DH10   | SE DH10 | DH20   | SE DH20 | DH50   | SE DH50 | DH80  | SE DH80 | DH100  | SE DH100 | DH200 | SE DH200 | DH500 | SE DH500 | DH1000 | SE DH1000 |
|-----|--------|---------|--------|---------|--------|---------|-------|---------|--------|----------|-------|----------|-------|----------|--------|-----------|
| 2   | -0.029 | 0.079   | -0.032 | 0.077   | 0.001  | 0.073   | 0.015 | 0.073   | 0.029  | 0.066    | 0.027 | 0.067    | 0.052 | 0.065    | 0.043  | 0.057     |
| 3   | -0.026 | 0.082   | 0.013  | 0.073   | -0.028 | 0.075   | 0.019 | 0.076   | -0.001 | 0.066    | 0.004 | 0.074    | 0.063 | 0.068    | 0.059  | 0.075     |
| 4   | -0.111 | 0.083   | -0.050 | 0.073   | -0.018 | 0.068   | 0.018 | 0.069   | 0.012  | 0.068    | 0.042 | 0.061    | 0.064 | 0.067    | 0.059  | 0.064     |
| 5   | -0.008 | 0.079   | 0.014  | 0.071   | -0.013 | 0.073   | 0.050 | 0.062   | 0.020  | 0.069    | 0.042 | 0.062    | 0.076 | 0.062    | 0.127  | 0.061     |
| 6   | -0.033 | 0.069   | 0.018  | 0.076   | 0.026  | 0.072   | 0.060 | 0.066   | 0.063  | 0.064    | 0.113 | 0.069    | 0.159 | 0.071    | 0.133  | 0.056     |
| 7   | 0.033  | 0.075   | 0.037  | 0.068   | 0.095  | 0.066   | 0.076 | 0.070   | 0.111  | 0.063    | 0.131 | 0.066    | 0.158 | 0.063    | 0.175  | 0.058     |
| 8   | -0.006 | 0.066   | 0.083  | 0.066   | 0.111  | 0.073   | 0.075 | 0.063   | 0.114  | 0.062    | 0.172 | 0.069    | 0.225 | 0.058    | 0.215  | 0.059     |
| 9   | 0.086  | 0.073   | 0.100  | 0.065   | 0.106  | 0.057   | 0.130 | 0.062   | 0.164  | 0.059    | 0.144 | 0.056    | 0.223 | 0.055    | 0.232  | 0.060     |
| 10  | 0.067  | 0.069   | 0.100  | 0.067   | 0.117  | 0.054   | 0.128 | 0.067   | 0.187  | 0.063    | 0.184 | 0.056    | 0.266 | 0.061    | 0.300  | 0.057     |

**Table S3** Difference in genetic gain between OHV and GS over 20 generations

| Gen | nGen20 | SE nGen20 |
|-----|--------|-----------|
| 2   | 0.110  | 0.087     |
| 3   | -0.052 | 0.095     |
| 4   | -0.004 | 0.085     |
| 5   | 0.035  | 0.079     |
| 6   | 0.129  | 0.086     |
| 7   | 0.186  | 0.090     |
| 8   | 0.284  | 0.098     |
| 9   | 0.305  | 0.085     |
| 10  | 0.358  | 0.075     |
| 11  | 0.346  | 0.079     |
| 12  | 0.422  | 0.078     |
| 13  | 0.425  | 0.076     |
| 14  | 0.441  | 0.076     |
| 15  | 0.435  | 0.081     |
| 16  | 0.493  | 0.069     |
| 17  | 0.511  | 0.075     |
| 18  | 0.502  | 0.067     |
| 19  | 0.478  | 0.066     |
| 20  | 0.489  | 0.071     |

**Table S4 Difference in genetic gain between OHV and GS when varying the number of elite individuals used for doubled haploid production (nEliteInd)**

| Gen | nEliteInd1 | SE nEliteInd1 | nEliteInd5 | SE nEliteInd5 | nEliteInd10 | SE nEliteInd10 | nEliteInd20 | SE nEliteInd20 | nEliteInd50 | SE nEliteInd50 | nEliteInd100 | SE nEliteInd100 |
|-----|------------|---------------|------------|---------------|-------------|----------------|-------------|----------------|-------------|----------------|--------------|-----------------|
| 2   | -0.046     | 0.228         | 0.045      | 0.166         | 0.059       | 0.131          | 0.021       | 0.120          | 0.118       | 0.106          | 0.083        | 0.094           |
| 3   | -0.242     | 0.211         | -0.031     | 0.164         | -0.001      | 0.131          | 0.049       | 0.155          | 0.091       | 0.132          | -0.020       | 0.124           |
| 4   | -0.236     | 0.215         | -0.016     | 0.141         | 0.024       | 0.136          | 0.029       | 0.125          | 0.178       | 0.121          | 0.141        | 0.121           |
| 5   | -0.244     | 0.206         | 0.075      | 0.141         | 0.039       | 0.138          | 0.105       | 0.130          | 0.174       | 0.119          | 0.218        | 0.101           |
| 6   | -0.148     | 0.203         | 0.056      | 0.156         | 0.125       | 0.127          | 0.205       | 0.134          | 0.206       | 0.129          | 0.214        | 0.125           |
| 7   | -0.126     | 0.184         | 0.161      | 0.145         | 0.222       | 0.125          | 0.181       | 0.119          | 0.244       | 0.115          | 0.313        | 0.115           |
| 8   | -0.097     | 0.174         | 0.066      | 0.127         | 0.228       | 0.124          | 0.280       | 0.119          | 0.380       | 0.115          | 0.355        | 0.095           |
| 9   | -0.099     | 0.199         | 0.209      | 0.131         | 0.328       | 0.117          | 0.366       | 0.114          | 0.408       | 0.107          | 0.418        | 0.103           |
| 10  | -0.077     | 0.139         | 0.240      | 0.122         | 0.374       | 0.126          | 0.386       | 0.113          | 0.412       | 0.098          | 0.436        | 0.108           |

**Table S5 Difference in genetic gain between OHV and GS when varying the number of elite doubled haploids cycled back into the breeding program (nDHcycled)**

| Gen | SE             |                | SE              |                 | SE              |                 | SE              |                 | SE              |                 | SE               |                  | SE               |                  | SE               |                  |
|-----|----------------|----------------|-----------------|-----------------|-----------------|-----------------|-----------------|-----------------|-----------------|-----------------|------------------|------------------|------------------|------------------|------------------|------------------|
|     | nDHcyc<br>led0 | nDHcyc<br>led0 | nDHcycl<br>ed10 | nDHcycl<br>ed10 | nDHcycl<br>ed20 | nDHcycl<br>ed20 | nDHcycl<br>ed50 | nDHcycl<br>ed50 | nDHcycl<br>ed80 | nDHcycl<br>ed80 | nDHcycl<br>ed100 | nDHcycl<br>ed100 | nDHcycl<br>ed200 | nDHcycl<br>ed200 | nDHcycl<br>ed500 | nDHcycl<br>ed500 |
| 2   | 0.059          | 0.131          | 0.059           | 0.131           | 0.059           | 0.131           | 0.059           | 0.131           | 0.059           | 0.131           | 0.059            | 0.131            | 0.059            | 0.131            | 0.059            | 0.131            |
| 3   | -0.001         | 0.131          | -0.001          | 0.131           | -0.001          | 0.131           | -0.001          | 0.131           | -0.001          | 0.131           | -0.001           | 0.131            | -0.001           | 0.131            | -0.001           | 0.131            |
| 4   | 0.050          | 0.132          | 0.018           | 0.136           | 0.079           | 0.132           | 0.024           | 0.136           | 0.057           | 0.138           | 0.038            | 0.131            | 0.014            | 0.126            | 0.009            | 0.138            |
| 5   | 0.129          | 0.132          | 0.009           | 0.126           | 0.064           | 0.125           | 0.039           | 0.138           | 0.085           | 0.154           | 0.069            | 0.134            | 0.079            | 0.129            | 0.037            | 0.128            |
| 6   | 0.076          | 0.130          | 0.174           | 0.122           | 0.093           | 0.134           | 0.125           | 0.127           | 0.138           | 0.146           | 0.130            | 0.133            | 0.091            | 0.150            | 0.102            | 0.127            |
| 7   | 0.158          | 0.121          | 0.239           | 0.126           | 0.165           | 0.122           | 0.222           | 0.125           | 0.181           | 0.136           | 0.182            | 0.122            | 0.186            | 0.145            | 0.140            | 0.127            |
| 8   | 0.218          | 0.125          | 0.169           | 0.116           | 0.173           | 0.123           | 0.228           | 0.124           | 0.206           | 0.120           | 0.279            | 0.138            | 0.177            | 0.137            | 0.169            | 0.128            |
| 9   | 0.231          | 0.134          | 0.296           | 0.134           | 0.293           | 0.135           | 0.328           | 0.117           | 0.298           | 0.134           | 0.248            | 0.112            | 0.306            | 0.123            | 0.187            | 0.134            |
| 10  | 0.266          | 0.119          | 0.333           | 0.136           | 0.349           | 0.118           | 0.374           | 0.126           | 0.316           | 0.112           | 0.317            | 0.109            | 0.301            | 0.117            | 0.224            | 0.111            |

**Table S6 True breeding value variance per generation in GS or OHV breeding programs**

| Gen | GS DEFAULT | GS DEFAULT | OHV DEFAULT | SE OHV DEFAULT | GS nDH0 | SE GS nDH0 | OHV nDH0 | SE OHV nDH0 | OHV nDH500 | SE nDH500 |
|-----|------------|------------|-------------|----------------|---------|------------|----------|-------------|------------|-----------|
| 1   | 175.690    | 0.366      | 175.690     | 3.639          | 175.690 | 0.366      | 175.690  | 0.366       | 175.690    | 3.639     |
| 2   | 23.246     | 0.073      | 29.741      | 0.800          | 23.246  | 0.073      | 29.741   | 0.080       | 29.741     | 0.800     |
| 3   | 42.556     | 0.078      | 74.094      | 1.102          | 42.556  | 0.078      | 74.094   | 0.111       | 74.094     | 1.102     |
| 4   | 40.526     | 0.066      | 79.042      | 1.013          | 38.585  | 0.061      | 75.451   | 0.094       | 54.978     | 0.699     |
| 5   | 37.736     | 0.059      | 78.516      | 0.964          | 35.699  | 0.056      | 75.086   | 0.091       | 55.451     | 0.734     |
| 6   | 35.212     | 0.052      | 76.654      | 0.906          | 32.393  | 0.049      | 73.701   | 0.090       | 54.751     | 0.712     |
| 7   | 32.654     | 0.050      | 74.392      | 0.905          | 29.172  | 0.045      | 71.530   | 0.089       | 54.213     | 0.750     |
| 8   | 30.344     | 0.044      | 71.949      | 0.880          | 26.015  | 0.041      | 68.097   | 0.086       | 52.197     | 0.739     |
| 9   | 28.294     | 0.042      | 68.766      | 0.872          | 23.066  | 0.037      | 64.525   | 0.080       | 50.611     | 0.743     |
| 10  | 26.654     | 0.041      | 64.877      | 0.784          | 20.323  | 0.033      | 60.321   | 0.077       | 49.130     | 0.663     |

**Table S7 Difference in genetic gain between OHV and GS when varying the number of QTL (nQTL)**

| Gen | nQTL100 | SE nQTL100 | nQTL500 | SE nQTL500 | nQTL1000 | SE nQTL1000 |
|-----|---------|------------|---------|------------|----------|-------------|
| 2   | 0.056   | 0.058      | 0.059   | 0.131      | 0.065    | 0.211       |
| 3   | 0.042   | 0.049      | -0.001  | 0.131      | -0.031   | 0.184       |
| 4   | 0.036   | 0.043      | 0.024   | 0.136      | -0.061   | 0.191       |
| 5   | 0.046   | 0.036      | 0.039   | 0.138      | 0.035    | 0.191       |
| 6   | 0.053   | 0.035      | 0.125   | 0.127      | 0.230    | 0.208       |
| 7   | 0.045   | 0.034      | 0.222   | 0.125      | 0.286    | 0.206       |
| 8   | 0.045   | 0.026      | 0.228   | 0.124      | 0.394    | 0.190       |
| 9   | 0.038   | 0.023      | 0.328   | 0.117      | 0.474    | 0.215       |
| 10  | 0.035   | 0.023      | 0.374   | 0.126      | 0.453    | 0.174       |

**Table S8** Difference in genetic gain between OHV and GS when varying the number of segments (nSeg)

| Gen | nSeg1 | SE nSeg1 | nSeg2 | SE nSeg2 | nSeg3  | SE nSeg3 | nSeg6  | SE nSeg6 | nSeg12 | SE nSeg12 |
|-----|-------|----------|-------|----------|--------|----------|--------|----------|--------|-----------|
| 2   | 0.125 | 0.138    | 0.077 | 0.135    | 0.059  | 0.131    | -0.046 | 0.136    | -0.130 | 0.166     |
| 3   | 0.136 | 0.154    | 0.067 | 0.142    | -0.001 | 0.131    | -0.115 | 0.145    | -0.201 | 0.155     |
| 4   | 0.141 | 0.124    | 0.108 | 0.144    | 0.024  | 0.136    | -0.085 | 0.133    | -0.359 | 0.141     |
| 5   | 0.175 | 0.122    | 0.169 | 0.142    | 0.039  | 0.138    | -0.073 | 0.147    | -0.375 | 0.150     |
| 6   | 0.274 | 0.122    | 0.246 | 0.125    | 0.125  | 0.127    | -0.078 | 0.132    | -0.324 | 0.133     |
| 7   | 0.349 | 0.116    | 0.274 | 0.148    | 0.222  | 0.125    | -0.038 | 0.155    | -0.280 | 0.144     |
| 8   | 0.345 | 0.126    | 0.345 | 0.129    | 0.228  | 0.124    | 0.068  | 0.137    | -0.310 | 0.129     |
| 9   | 0.352 | 0.129    | 0.369 | 0.110    | 0.328  | 0.117    | 0.070  | 0.138    | -0.279 | 0.125     |
| 10  | 0.380 | 0.115    | 0.450 | 0.120    | 0.374  | 0.126    | 0.096  | 0.151    | -0.249 | 0.135     |
