# Supplementary material
Source: PubMed Central journal article supplement (PMC4574260)
Supplement: 10.1534_115.178038_genetics.115.178038-2.pdf [file 10.1534_115.178038_genetics.115.178038-2.pdf]

**Table S4 Difference in genetic gain between OHV and GS when varying the number of elite individuals used for doubled haploid production (nEliteInd)**

| Gen | nEliteInd1 | SE nEliteInd1 | nEliteInd5 | SE nEliteInd5 | nEliteInd10 | SE nEliteInd10 | nEliteInd20 | SE nEliteInd20 | nEliteInd50 | SE nEliteInd50 | nEliteInd100 | SE nEliteInd100 |
|-----|------------|---------------|------------|---------------|-------------|----------------|-------------|----------------|-------------|----------------|--------------|-----------------|
| 2   | -0.046     | 0.228         | 0.045      | 0.166         | 0.059       | 0.131          | 0.021       | 0.120          | 0.118       | 0.106          | 0.083        | 0.094           |
| 3   | -0.242     | 0.211         | -0.031     | 0.164         | -0.001      | 0.131          | 0.049       | 0.155          | 0.091       | 0.132          | -0.020       | 0.124           |
| 4   | -0.236     | 0.215         | -0.016     | 0.141         | 0.024       | 0.136          | 0.029       | 0.125          | 0.178       | 0.121          | 0.141        | 0.121           |
| 5   | -0.244     | 0.206         | 0.075      | 0.141         | 0.039       | 0.138          | 0.105       | 0.130          | 0.174       | 0.119          | 0.218        | 0.101           |
| 6   | -0.148     | 0.203         | 0.056      | 0.156         | 0.125       | 0.127          | 0.205       | 0.134          | 0.206       | 0.129          | 0.214        | 0.125           |
| 7   | -0.126     | 0.184         | 0.161      | 0.145         | 0.222       | 0.125          | 0.181       | 0.119          | 0.244       | 0.115          | 0.313        | 0.115           |
| 8   | -0.097     | 0.174         | 0.066      | 0.127         | 0.228       | 0.124          | 0.280       | 0.119          | 0.380       | 0.115          | 0.355        | 0.095           |
| 9   | -0.099     | 0.199         | 0.209      | 0.131         | 0.328       | 0.117          | 0.366       | 0.114          | 0.408       | 0.107          | 0.418        | 0.103           |
| 10  | -0.077     | 0.139         | 0.240      | 0.122         | 0.374       | 0.126          | 0.386       | 0.113          | 0.412       | 0.098          | 0.436        | 0.108           |
