# Supplementary material
Source: PubMed Central journal article supplement (PMC4574260)
Supplement: 10.1534_115.178038_genetics.115.178038-3.pdf [file 10.1534_115.178038_genetics.115.178038-3.pdf]

**Table S7** Difference in genetic gain between OHV and GS when varying the number of QTL (nQTL)

| Gen | nQTL100 | SE nQTL100 | nQTL500 | SE nQTL500 | nQTL1000 | SE nQTL1000 |
|-----|---------|------------|---------|------------|----------|-------------|
| 2   | 0.056   | 0.058      | 0.059   | 0.131      | 0.065    | 0.211       |
| 3   | 0.042   | 0.049      | -0.001  | 0.131      | -0.031   | 0.184       |
| 4   | 0.036   | 0.043      | 0.024   | 0.136      | -0.061   | 0.191       |
| 5   | 0.046   | 0.036      | 0.039   | 0.138      | 0.035    | 0.191       |
| 6   | 0.053   | 0.035      | 0.125   | 0.127      | 0.230    | 0.208       |
| 7   | 0.045   | 0.034      | 0.222   | 0.125      | 0.286    | 0.206       |
| 8   | 0.045   | 0.026      | 0.228   | 0.124      | 0.394    | 0.190       |
| 9   | 0.038   | 0.023      | 0.328   | 0.117      | 0.474    | 0.215       |
| 10  | 0.035   | 0.023      | 0.374   | 0.126      | 0.453    | 0.174       |
