# Supplementary material
Source: PubMed Central journal article supplement (PMC4574260)
Supplement: 10.1534_115.178038_genetics.115.178038-4.pdf [file 10.1534_115.178038_genetics.115.178038-4.pdf]

**Table S3** Difference in genetic gain between OHV and GS over 20 generations

| Gen | nGen20 | SE nGen20 |
|-----|--------|-----------|
| 2   | 0.110  | 0.087     |
| 3   | -0.052 | 0.095     |
| 4   | -0.004 | 0.085     |
| 5   | 0.035  | 0.079     |
| 6   | 0.129  | 0.086     |
| 7   | 0.186  | 0.090     |
| 8   | 0.284  | 0.098     |
| 9   | 0.305  | 0.085     |
| 10  | 0.358  | 0.075     |
| 11  | 0.346  | 0.079     |
| 12  | 0.422  | 0.078     |
| 13  | 0.425  | 0.076     |
| 14  | 0.441  | 0.076     |
| 15  | 0.435  | 0.081     |
| 16  | 0.493  | 0.069     |
| 17  | 0.511  | 0.075     |
| 18  | 0.502  | 0.067     |
| 19  | 0.478  | 0.066     |
| 20  | 0.489  | 0.071     |
