# Supplementary material
Source: PubMed Central journal article supplement (PMC4574260)
Supplement: 10.1534_115.178038_genetics.115.178038-5.pdf [file 10.1534_115.178038_genetics.115.178038-5.pdf]

**Table S2 Difference in genetic gain between OHV and GS when varying the number of doubled haploids produced per elite individual (nDH)**

| Gen | DH10   | SE DH10 | DH20   | SE DH20 | DH50   | SE DH50 | DH80  | SE DH80 | DH100  | SE DH100 | DH200 | SE DH200 | DH500 | SE DH500 | DH1000 | SE DH1000 |
|-----|--------|---------|--------|---------|--------|---------|-------|---------|--------|----------|-------|----------|-------|----------|--------|-----------|
| 2   | -0.029 | 0.079   | -0.032 | 0.077   | 0.001  | 0.073   | 0.015 | 0.073   | 0.029  | 0.066    | 0.027 | 0.067    | 0.052 | 0.065    | 0.043  | 0.057     |
| 3   | -0.026 | 0.082   | 0.013  | 0.073   | -0.028 | 0.075   | 0.019 | 0.076   | -0.001 | 0.066    | 0.004 | 0.074    | 0.063 | 0.068    | 0.059  | 0.075     |
| 4   | -0.111 | 0.083   | -0.050 | 0.073   | -0.018 | 0.068   | 0.018 | 0.069   | 0.012  | 0.068    | 0.042 | 0.061    | 0.064 | 0.067    | 0.059  | 0.064     |
| 5   | -0.008 | 0.079   | 0.014  | 0.071   | -0.013 | 0.073   | 0.050 | 0.062   | 0.020  | 0.069    | 0.042 | 0.062    | 0.076 | 0.062    | 0.127  | 0.061     |
| 6   | -0.033 | 0.069   | 0.018  | 0.076   | 0.026  | 0.072   | 0.060 | 0.066   | 0.063  | 0.064    | 0.113 | 0.069    | 0.159 | 0.071    | 0.133  | 0.056     |
| 7   | 0.033  | 0.075   | 0.037  | 0.068   | 0.095  | 0.066   | 0.076 | 0.070   | 0.111  | 0.063    | 0.131 | 0.066    | 0.158 | 0.063    | 0.175  | 0.058     |
| 8   | -0.006 | 0.066   | 0.083  | 0.066   | 0.111  | 0.073   | 0.075 | 0.063   | 0.114  | 0.062    | 0.172 | 0.069    | 0.225 | 0.058    | 0.215  | 0.059     |
| 9   | 0.086  | 0.073   | 0.100  | 0.065   | 0.106  | 0.057   | 0.130 | 0.062   | 0.164  | 0.059    | 0.144 | 0.056    | 0.223 | 0.055    | 0.232  | 0.060     |
| 10  | 0.067  | 0.069   | 0.100  | 0.067   | 0.117  | 0.054   | 0.128 | 0.067   | 0.187  | 0.063    | 0.184 | 0.056    | 0.266 | 0.061    | 0.300  | 0.057     |
