# Supplementary material
Source: PubMed Central journal article supplement (PMC4574260)
Supplement: 10.1534_115.178038_genetics.115.178038-6.pdf [file 10.1534_115.178038_genetics.115.178038-6.pdf]

**Table S6 True breeding value variance per generation in GS or OHV breeding programs**

| Gen | GS DEFAULT | GS DEFAULT | OHV DEFAULT | SE OHV DEFAULT | GS nDH0 | SE GS nDH0 | OHV nDH0 | SE OHV nDH0 | OHV nDH500 | SE nDH500 |
|-----|------------|------------|-------------|----------------|---------|------------|----------|-------------|------------|-----------|
| 1   | 175.690    | 0.366      | 175.690     | 3.639          | 175.690 | 0.366      | 175.690  | 0.366       | 175.690    | 3.639     |
| 2   | 23.246     | 0.073      | 29.741      | 0.800          | 23.246  | 0.073      | 29.741   | 0.080       | 29.741     | 0.800     |
| 3   | 42.556     | 0.078      | 74.094      | 1.102          | 42.556  | 0.078      | 74.094   | 0.111       | 74.094     | 1.102     |
| 4   | 40.526     | 0.066      | 79.042      | 1.013          | 38.585  | 0.061      | 75.451   | 0.094       | 54.978     | 0.699     |
| 5   | 37.736     | 0.059      | 78.516      | 0.964          | 35.699  | 0.056      | 75.086   | 0.091       | 55.451     | 0.734     |
| 6   | 35.212     | 0.052      | 76.654      | 0.906          | 32.393  | 0.049      | 73.701   | 0.090       | 54.751     | 0.712     |
| 7   | 32.654     | 0.050      | 74.392      | 0.905          | 29.172  | 0.045      | 71.530   | 0.089       | 54.213     | 0.750     |
| 8   | 30.344     | 0.044      | 71.949      | 0.880          | 26.015  | 0.041      | 68.097   | 0.086       | 52.197     | 0.739     |
| 9   | 28.294     | 0.042      | 68.766      | 0.872          | 23.066  | 0.037      | 64.525   | 0.080       | 50.611     | 0.743     |
| 10  | 26.654     | 0.041      | 64.877      | 0.784          | 20.323  | 0.033      | 60.321   | 0.077       | 49.130     | 0.663     |
