# Supplementary material
Source: PubMed Central journal article supplement (PMC4574260)
Supplement: 10.1534_115.178038_genetics.115.178038-7.pdf [file 10.1534_115.178038_genetics.115.178038-7.pdf]

**Table S5 Difference in genetic gain between OHV and GS when varying the number of elite doubled haploids cycled back into the breeding program (nDHcycled)**

| Gen | SE             |                | SE              |                 | SE              |                 | SE              |                 | SE              |                 | SE               |                  | SE               |                  | SE               |                  |
|-----|----------------|----------------|-----------------|-----------------|-----------------|-----------------|-----------------|-----------------|-----------------|-----------------|------------------|------------------|------------------|------------------|------------------|------------------|
|     | nDHcyc<br>led0 | nDHcyc<br>led0 | nDHcycl<br>ed10 | nDHcycl<br>ed10 | nDHcycl<br>ed20 | nDHcycl<br>ed20 | nDHcycl<br>ed50 | nDHcycl<br>ed50 | nDHcycl<br>ed80 | nDHcycl<br>ed80 | nDHcycl<br>ed100 | nDHcycl<br>ed100 | nDHcycl<br>ed200 | nDHcycl<br>ed200 | nDHcycl<br>ed500 | nDHcycl<br>ed500 |
| 2   | 0.059          | 0.131          | 0.059           | 0.131           | 0.059           | 0.131           | 0.059           | 0.131           | 0.059           | 0.131           | 0.059            | 0.131            | 0.059            | 0.131            | 0.059            | 0.131            |
| 3   | -0.001         | 0.131          | -0.001          | 0.131           | -0.001          | 0.131           | -0.001          | 0.131           | -0.001          | 0.131           | -0.001           | 0.131            | -0.001           | 0.131            | -0.001           | 0.131            |
| 4   | 0.050          | 0.132          | 0.018           | 0.136           | 0.079           | 0.132           | 0.024           | 0.136           | 0.057           | 0.138           | 0.038            | 0.131            | 0.014            | 0.126            | 0.009            | 0.138            |
| 5   | 0.129          | 0.132          | 0.009           | 0.126           | 0.064           | 0.125           | 0.039           | 0.138           | 0.085           | 0.154           | 0.069            | 0.134            | 0.079            | 0.129            | 0.037            | 0.128            |
| 6   | 0.076          | 0.130          | 0.174           | 0.122           | 0.093           | 0.134           | 0.125           | 0.127           | 0.138           | 0.146           | 0.130            | 0.133            | 0.091            | 0.150            | 0.102            | 0.127            |
| 7   | 0.158          | 0.121          | 0.239           | 0.126           | 0.165           | 0.122           | 0.222           | 0.125           | 0.181           | 0.136           | 0.182            | 0.122            | 0.186            | 0.145            | 0.140            | 0.127            |
| 8   | 0.218          | 0.125          | 0.169           | 0.116           | 0.173           | 0.123           | 0.228           | 0.124           | 0.206           | 0.120           | 0.279            | 0.138            | 0.177            | 0.137            | 0.169            | 0.128            |
| 9   | 0.231          | 0.134          | 0.296           | 0.134           | 0.293           | 0.135           | 0.328           | 0.117           | 0.298           | 0.134           | 0.248            | 0.112            | 0.306            | 0.123            | 0.187            | 0.134            |
| 10  | 0.266          | 0.119          | 0.333           | 0.136           | 0.349           | 0.118           | 0.374           | 0.126           | 0.316           | 0.112           | 0.317            | 0.109            | 0.301            | 0.117            | 0.224            | 0.111            |
