# Supplementary material
Source: PubMed Central journal article supplement (PMC4574260)
Supplement: 10.1534_115.178038_genetics.115.178038-8.pdf [file 10.1534_115.178038_genetics.115.178038-8.pdf]

**Table S1 Difference in genetic gain between OHV GS when varying the number of offspring produced per cross (nOff)**

| Gen | Off10  | SE Off10 | Off20  | SE Off20 | Off50 | SE Off50 | Off80 | SE Off80 | Off100 | SE Off100 | Off200 | SE Off200 | Off500 | SE Off500 | Off1000 | SE Off1000 |
|-----|--------|----------|--------|----------|-------|----------|-------|----------|--------|-----------|--------|-----------|--------|-----------|---------|------------|
| 2   | -0.005 | 0.136    | -0.022 | 0.128    | 0.092 | 0.134    | 0.048 | 0.132    | 0.059  | 0.131     | 0.051  | 0.154     | 0.059  | 0.134     | 0.036   | 0.134      |
| 3   | -0.029 | 0.119    | 0.029  | 0.146    | 0.048 | 0.166    | 0.048 | 0.169    | -0.001 | 0.131     | 0.066  | 0.127     | -0.027 | 0.135     | 0.101   | 0.150      |
| 4   | -0.041 | 0.140    | -0.019 | 0.136    | 0.035 | 0.136    | 0.049 | 0.130    | 0.024  | 0.136     | 0.108  | 0.129     | 0.086  | 0.151     | 0.129   | 0.148      |
| 5   | 0.008  | 0.127    | -0.021 | 0.121    | 0.026 | 0.149    | 0.106 | 0.127    | 0.039  | 0.138     | 0.185  | 0.128     | 0.105  | 0.131     | 0.138   | 0.152      |
| 6   | 0.025  | 0.122    | 0.127  | 0.115    | 0.099 | 0.117    | 0.078 | 0.142    | 0.125  | 0.127     | 0.211  | 0.140     | 0.258  | 0.162     | 0.320   | 0.168      |
| 7   | 0.044  | 0.148    | 0.095  | 0.120    | 0.154 | 0.129    | 0.183 | 0.117    | 0.222  | 0.125     | 0.281  | 0.167     | 0.242  | 0.142     | 0.331   | 0.170      |
| 8   | 0.067  | 0.125    | 0.112  | 0.114    | 0.208 | 0.119    | 0.239 | 0.119    | 0.228  | 0.124     | 0.350  | 0.148     | 0.329  | 0.159     | 0.396   | 0.185      |
| 9   | 0.086  | 0.143    | 0.164  | 0.131    | 0.198 | 0.117    | 0.297 | 0.126    | 0.328  | 0.117     | 0.329  | 0.143     | 0.364  | 0.165     | 0.503   | 0.194      |
| 10  | 0.051  | 0.123    | 0.188  | 0.116    | 0.274 | 0.105    | 0.363 | 0.130    | 0.374  | 0.126     | 0.382  | 0.118     | 0.451  | 0.173     | 0.592   | 0.218      |
