# Supplementary material
Source: PubMed Central journal article supplement (PMC4574260)
Supplement: 10.1534_115.178038_genetics.115.178038-9.pdf [file 10.1534_115.178038_genetics.115.178038-9.pdf]

**Table S8** Difference in genetic gain between OHV and GS when varying the number of segments (nSeg)

| Gen | nSeg1 | SE nSeg1 | nSeg2 | SE nSeg2 | nSeg3  | SE nSeg3 | nSeg6  | SE nSeg6 | nSeg12 | SE nSeg12 |
|-----|-------|----------|-------|----------|--------|----------|--------|----------|--------|-----------|
| 2   | 0.125 | 0.138    | 0.077 | 0.135    | 0.059  | 0.131    | -0.046 | 0.136    | -0.130 | 0.166     |
| 3   | 0.136 | 0.154    | 0.067 | 0.142    | -0.001 | 0.131    | -0.115 | 0.145    | -0.201 | 0.155     |
| 4   | 0.141 | 0.124    | 0.108 | 0.144    | 0.024  | 0.136    | -0.085 | 0.133    | -0.359 | 0.141     |
| 5   | 0.175 | 0.122    | 0.169 | 0.142    | 0.039  | 0.138    | -0.073 | 0.147    | -0.375 | 0.150     |
| 6   | 0.274 | 0.122    | 0.246 | 0.125    | 0.125  | 0.127    | -0.078 | 0.132    | -0.324 | 0.133     |
| 7   | 0.349 | 0.116    | 0.274 | 0.148    | 0.222  | 0.125    | -0.038 | 0.155    | -0.280 | 0.144     |
| 8   | 0.345 | 0.126    | 0.345 | 0.129    | 0.228  | 0.124    | 0.068  | 0.137    | -0.310 | 0.129     |
| 9   | 0.352 | 0.129    | 0.369 | 0.110    | 0.328  | 0.117    | 0.070  | 0.138    | -0.279 | 0.125     |
| 10  | 0.380 | 0.115    | 0.450 | 0.120    | 0.374  | 0.126    | 0.096  | 0.151    | -0.249 | 0.135     |
